# Supplementary material for: Leukemic stem cell persistence in chronic myeloid leukemia patients in deep molecular response induced by tyrosine kinase inhibitors and the impact of therapy discontinuation
Source: PubMed Central journal article supplement (PMC5085229; doi:10.18632/oncotarget.9182), 2016-05-05
Supplement: oncotarget-07-35293-s001.pdf [file oncotarget-07-35293-s001.pdf]

## Leukemic stem cell persistence in chronic myeloid leukemia patients in deep molecular response induced by tyrosine kinase inhibitors and the impact of therapy discontinuation

### SUPPLEMENTARY FIGURE AND TABLE

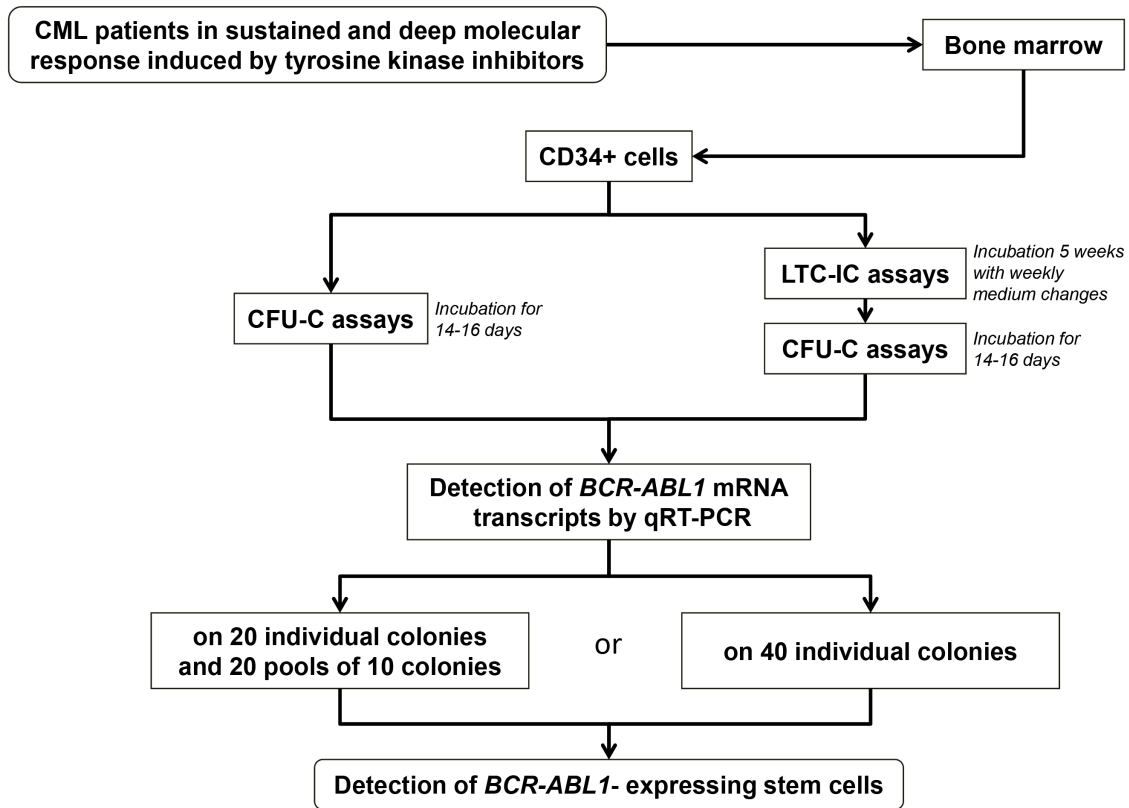

Supplementary Figure S1: Strategy used for the detection of *BCR-ABL1*-expressing leukemic stem cells.

**Supplementary Table S1: Characteristics of patients included in the study and progenitor/LSC analysis on CFU-C and LTC-IC assays**

See Supplementary File 1
